# Supplementary material for: Temporal Changes in Gene Expression Profile during Mature Adipocyte Dedifferentiation
Source: Hindawi journal article supplement (doi:10.1155/2017/5149362), 2017-01-01
Supplement: f1 [file 5149362.f1.pdf]

**Supplemental Table 1. Blood lipid profile of the patients involved in the study**

| <b>Patients</b> | <b>Total cholesterol (mmol/L)</b> | <b>Triglycerides (mmol/L)</b> | <b>HDL-cholesterol (mmol/L)</b> | <b>LDL-cholesterol (mmol/L)</b> | <b>Total cholesterol/HDL-cholesterol</b> | <b>HbA1c (%)</b> |
|-----------------|-----------------------------------|-------------------------------|---------------------------------|---------------------------------|------------------------------------------|------------------|
| 1               | 3.38                              | 2.22                          | 0.7                             | 1.67                            | 2.02                                     | 6.5              |
| 2               | 3.39                              | 1.86                          | 1.13                            | 1.42                            | 3.00                                     | 5.9              |
| 3               | 5.57                              | 1.49                          | 1.48                            | 3.41                            | 3.76                                     | 6.2              |
| 4               | 5.14                              | 1.21                          | 1.1                             | 3.39                            | 4.67                                     | 6.4              |

\*Patients 1 and 3 were taking medication for dyslipidemia. Patients 1,2 and 3 were taking medication for hypertension and were suffering from sleep apnea. All patients were non-smokers. Patients 1,2 and 4 were diabetic. Patient 1 was taking oral medication. patient 2 was treated with insulin and patient 4 did not take any medication.
